# Supplementary material
Source: publisher figshare collection journal article supplement (https://frontiersin.figshare.com/ndownloader/files/26779379)
Supplement: Supplementary file [file 26779379]

## *Supplementary Material*

**Supplementary table 1.** sCD163 and sCD14 plasmatic levels and immunophenotyping data in COVID-19 subjects classified into three groups: critical, severe and mild (according to the WHO classification)

|                             | critical (n=18)  | severe (n=44)    | mild (n=40)      | p value <sup>1</sup> | p value <sup>2</sup> | p value <sup>3</sup> | p value <sup>4</sup> |
|-----------------------------|------------------|------------------|------------------|----------------------|----------------------|----------------------|----------------------|
| sCD163 (ng/ml)              | 2404 (1892-3298) | 2040 (1546-2602) | 1700 (1314-2086) | 0.003                | ns                   | 0.004                | ns                   |
| sCD14 (ng/ml)               | 2841 (2149-3746) | 2774 (2080-3067) | 2292 (1749-2658) | ns                   | ns                   | ns                   | ns                   |
| Non-classical monocytes (%) | 3.3 (1.6-6.6)    | 6.2 (4.0-8.3)    | 9.0 (6.0-11.4)   | 0.002                | ns                   | 0.005                | ns                   |
| Intermediate monocytes (%)  | 3.7 (2.4-7.3)    | 5.4 (3.4-7.0)    | 5.8 (4.1-8.3)    | ns                   | ns                   | ns                   | ns                   |
| Classical monocytes (%)     | 47.0 (31.4-58.1) | 53.3 (32.2-63.8) | 44.7 (32.5-52.3) | ns                   | ns                   | ns                   | ns                   |
| SlanDCs (%)                 | 5.9 (1.9-11.5)   | 2.4 (0.9-3.7)    | 2.4 (0.2-4.1)    | ns                   | ns                   | ns                   | ns                   |
| mDCs (%)                    | 18.5 (9.1-24.6)  | 20.8 (10.3-27.3) | 27.7 (15.2-40.7) | ns                   | ns                   | ns                   | ns                   |
| pDCs (%)                    | 28.2 (22.5-33.6) | 25.8 (21.3-30.9) | 39.4 (22.5-46.0) | ns                   | ns                   | ns                   | ns                   |

mDCs: myeloid dendritic cells; pDCs: plasmacytoid dendritic cells. <sup>1</sup>: The nonparametric comparative Kruskal-Wallis test was used for comparing medians of critical, severe and mild groups. <sup>2</sup>: The Dunn's multiple comparison post-test was used for comparing medians of critical and severe groups. <sup>3</sup>: The Dunn's multiple comparison post-test was used for comparing medians of critical and mild groups. <sup>4</sup>: The Dunn's multiple comparison post-test was used for comparing medians of severe and mild groups.

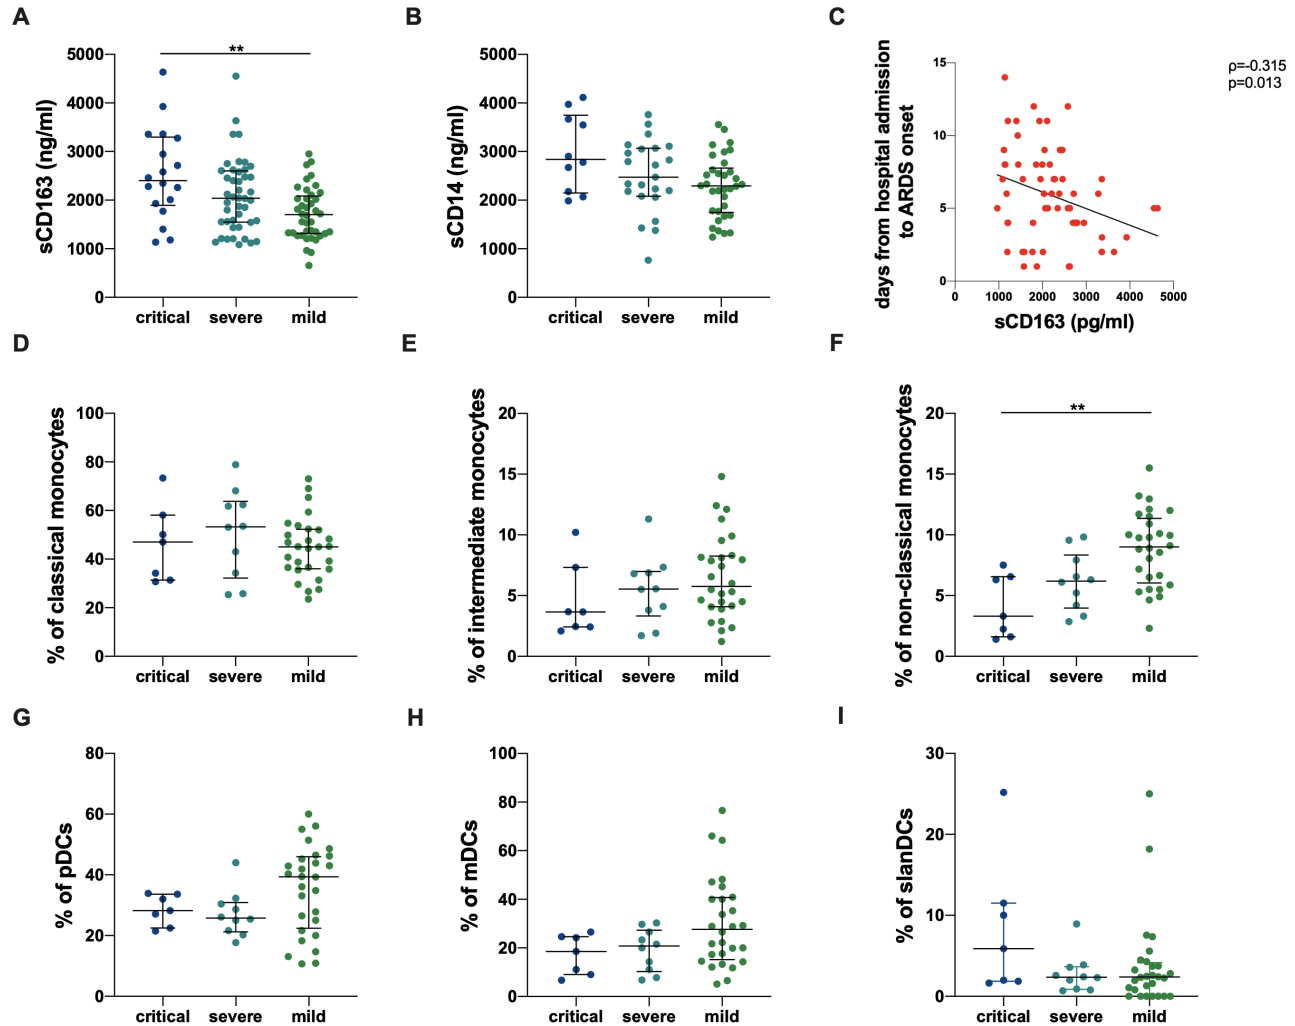

**Supplementary Figure 1.** Evaluation of sCD163 and sCD14 plasmatic levels and peripheral blood monocyte and DC subsets in COVID-19 subjects classified into three groups: critical, severe and mild (according to the WHO classification). **(A)** sCD163 plasmatic levels were evaluated in 18 patients with severe, 40 patients with critical and 44 patients with mild COVID-19. The differences were evaluated using the nonparametric Kruskal-Wallis test and Dunn's multiple comparison post-test for comparing medians of groups. Data are shown as median (lines) and interquartile ranges (whiskers). **(B)** sCD14 plasmatic levels were evaluated in 10 patients with severe, 23 patients with critical and 34 patients with mild COVID-19. The differences were evaluated using the nonparametric Kruskal-Wallis test and Dunn's multiple comparison post-test for comparing medians of groups. Data are shown as median (lines) and interquartile ranges (whiskers). **(C)** Negative correlation between sCD14 plasmatic levels and days from hospital admission to ARDS onset on 102 COVID-19 subjects. Correlation was performed using Spearman test. Spearman coefficient ( $\rho$ ) and statistical significance ( $p$ ) are reported in the graphics. Linear correlation was evaluated by using the regression test,  $R^2=0.093$   $p=0.017$ . **(D)** The percentage of classical monocyte was evaluated in 7 patients with severe, 10 patients with critical and 28 patients with mild COVID-19. The differences were evaluated using the nonparametric Kruskal-Wallis test and Dunn's multiple comparison post-test for comparing medians of groups. Data are shown as median (lines) and interquartile ranges

(whiskers). (E) The percentage of intermediate monocyte was evaluated in 7 patients with severe, 10 patients with critical and 28 patients with mild COVID-19. The differences were evaluated using the nonparametric Kruskal-Wallis test and Dunn's multiple comparison post-test for comparing medians of groups. Data are shown as median (lines) and interquartile ranges (whiskers). (F) The percentage of non-classical monocyte was evaluated in 7 patients with severe, 10 patients with critical and 28 patients with mild COVID-19. The differences were evaluated using the nonparametric Kruskal-Wallis test and Dunn's multiple comparison post-test for comparing medians of groups. Data are shown as median (lines) and interquartile ranges (whiskers). (G) The percentage of pDCs was evaluated in 7 patients with severe, 10 patients with critical and 28 patients with mild COVID-19. The differences were evaluated using the nonparametric Kruskal-Wallis test and Dunn's multiple comparison post-test for comparing medians of groups. Data are shown as median (lines) and interquartile ranges (whiskers). (H) The percentage of mDCs was evaluated in 7 patients with severe, 10 patients with critical and 28 patients with mild COVID-19. The differences were evaluated using the nonparametric Kruskal-Wallis test and Dunn's multiple comparison post-test for comparing medians of groups. Data are shown as median (lines) and interquartile ranges (whiskers). (I) The percentage of slanDCs was evaluated in 7 patients with severe, 10 patients with critical and 28 patients with mild COVID-19. The differences were evaluated using the nonparametric Kruskal-Wallis test and Dunn's multiple comparison post-test for comparing medians of groups. Data are shown as median (lines) and interquartile ranges (whiskers).

\*\*:  $0.01 < p < 0.001$
